# Supplementary material for: Homogeneous electrogenerated chemiluminescence peptide-based method for determination of troponin I
Source: Royal Society of Chemistry journal article supplement (doi:10.1039/c2ay25389e), 2012-01-01
Supplement: c2ay25389e.pdf [file c2ay25389e.pdf]

# Supporting information

Homogeneous electrogenerated chemiluminescence peptide-based  
method for determination of troponin I

Chen Wang, Honglan Qi\*, Xiaoying Qiu, Qiang Gao, Chengxiao Zhang

Key Laboratory of Analytical Chemistry for Life Science of Shaanxi Province, School  
of Chemistry and Chemical Engineering, Shaanxi Normal University, Xi'an, 710062,  
P. R. China

\* Corresponding authors. Tel.: +86 29 81530726; Fax: +86-29-81530727.

E-mail addresses: honglanqi@snnu.edu.cn (H. L. Qi).

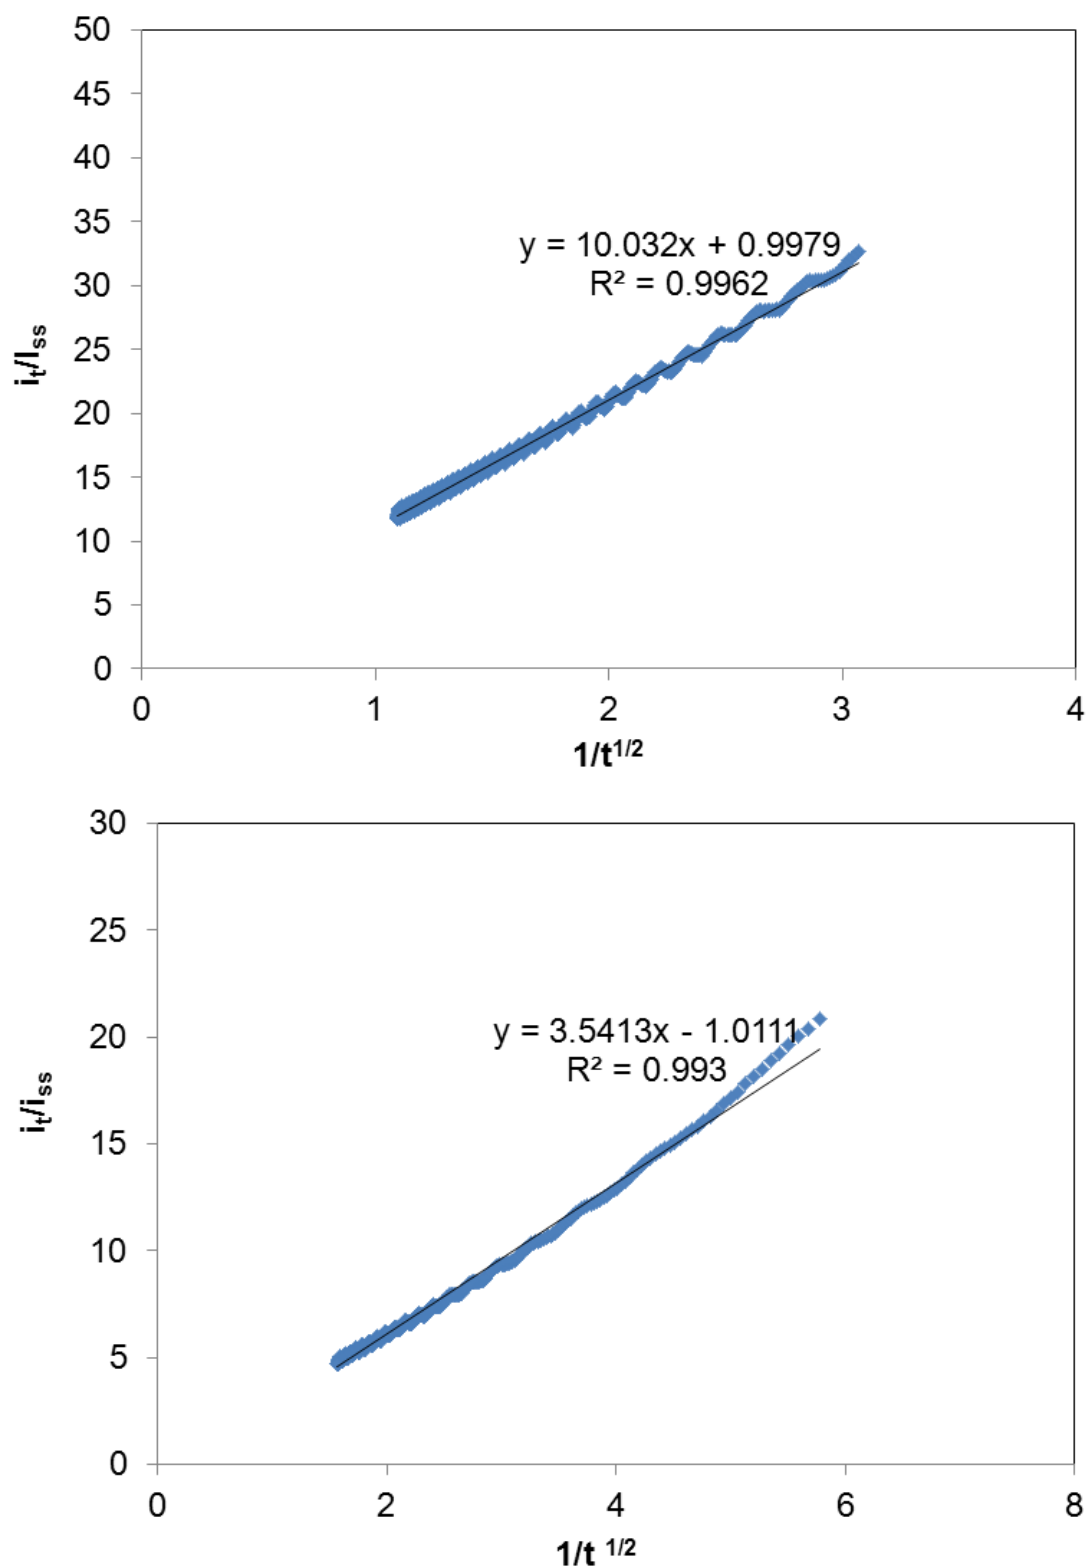

Figure S-1 Plot of the experimental ratio  $i_t/i_{ss}$  against the inverse square root of time in 0.1 M PBS with 10  $\mu$ m radius Pt UME. (a) Oxidation at step potential  $E_{SP} = +1.3$  V vs SCE for  $7.5 \times 10^{-6}$  M Ru-peptide, (b) Oxidation at step potential  $E_{SP} = +1.3$  V vs SCE

for  $7.5 \times 10^{-6}$  M Ru-peptide-protein conjugate.

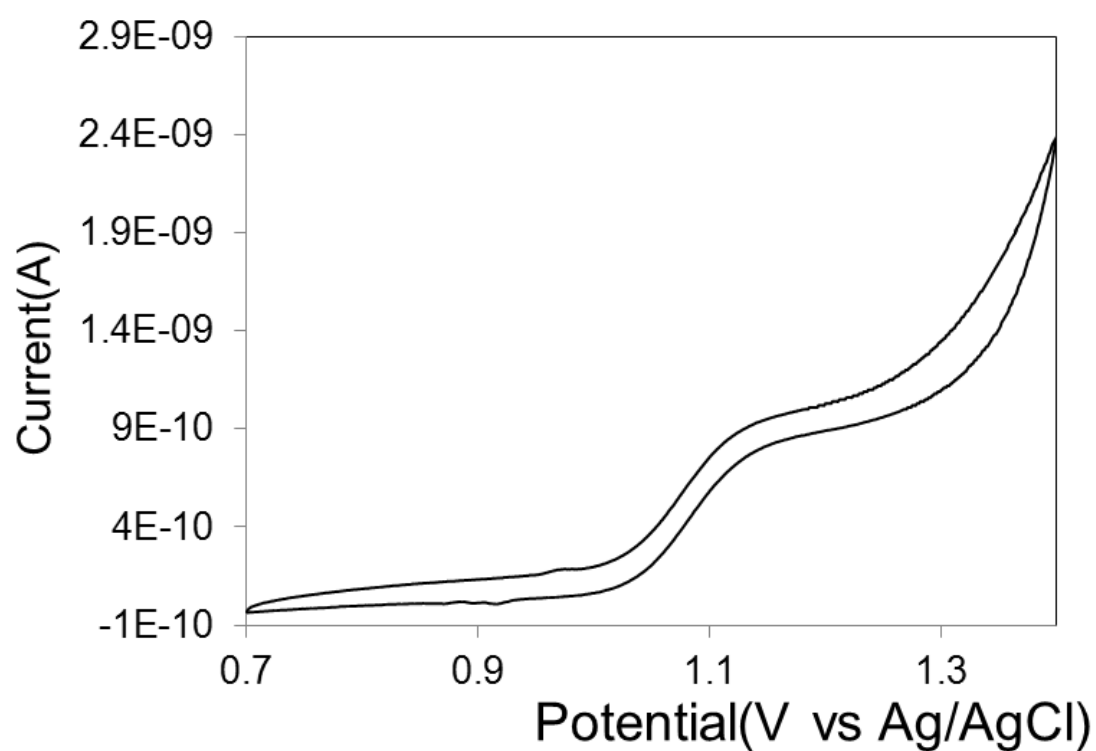

Figure S-2 Cyclic voltammogram of 1 mM Ru(bpy)<sub>2</sub>(dcbpy)NHS in 0.1 M PBS with 10 μm radius Pt ultramicroelectrode. Scan rate = 50 mV/s.

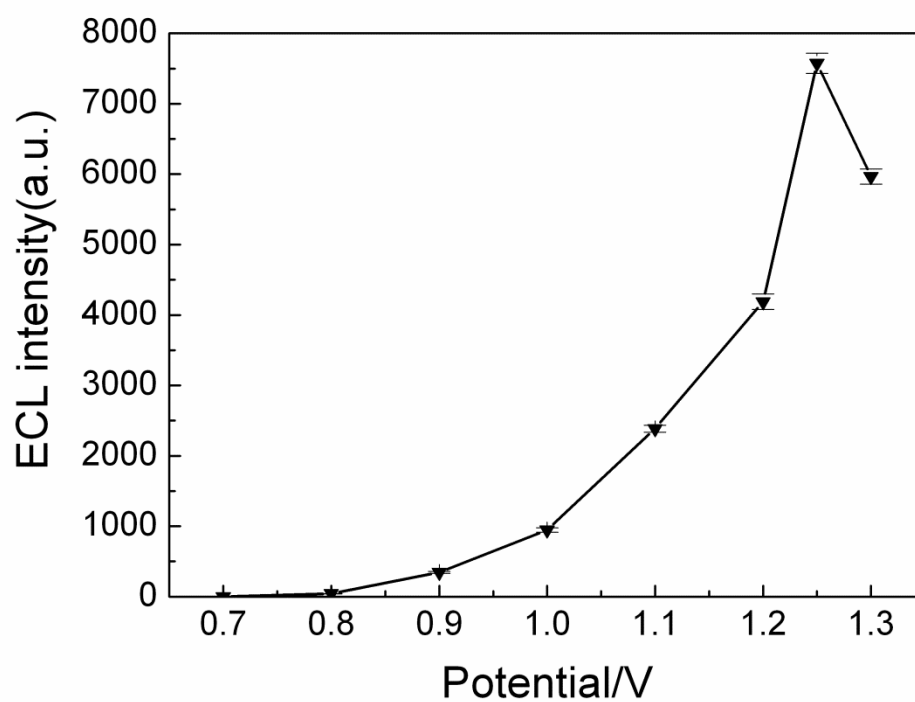

Figure S-3 Dependence of the ECL intensity of  $7.5 \times 10^{-8}$  M ECL probe on applied potential. Experimental condition: binding time, 60 min; detection solution, 0.10 M PBS (pH 7.4) containing 50 mM TPA.

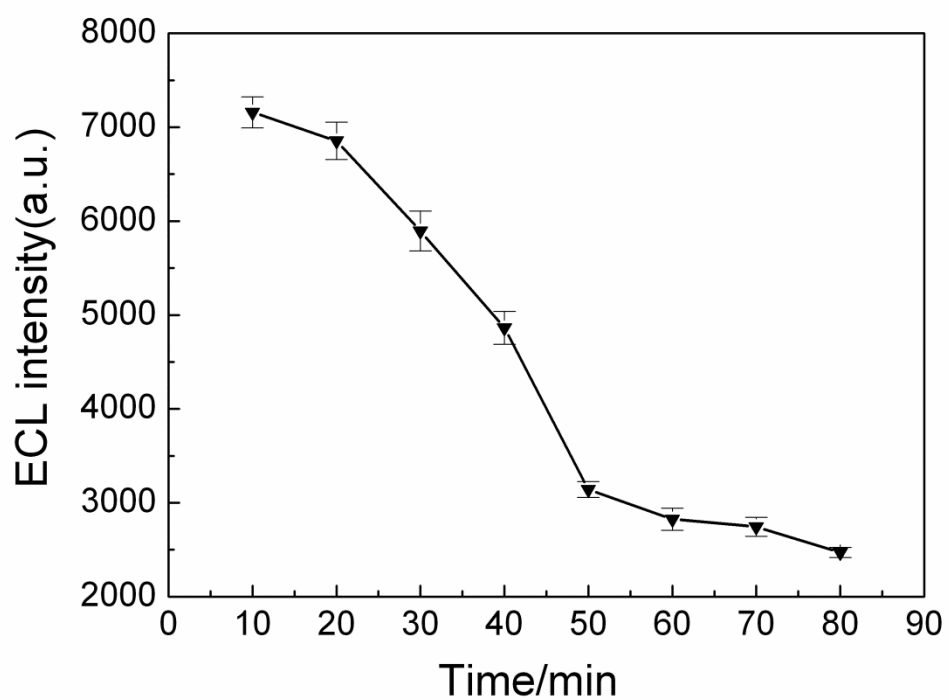

Figure S-4 Dependence of the ECL intensity of  $7.5 \times 10^{-8}$  M ECL probe on the binding time with  $3.9 \times 10^{-8}$  g/mL TnI.

Experimental condition: applied potential, +1.25 V; detection solution, 0.10 M PBS (pH 7.4) containing 50 mM TPA.
